# Supplementary material for: Enrichment effects on growth, health, and reproduction in a single clone of the asexual Amazon molly, Poecilia formosa
Source: PeerJ journal article supplement (doi:10.7717/peerj.18734), 2024-12-23
Supplement: Database.xlsx [file Database.xlsx]

## Sheet: Sheet1
Fish Number	Type	Source tank	Born	Died	Position in rack	Treatment	Neighbor?	Picture?	Day 30	Day 90	measured by	measurement 1	weight 1	size 1	Day 120	measured by	measurement 2	weight 2	size 2	Day 150	measured by	measurement 3	weight 3	size 3	Day 180	measured by	measurement 4	weight 4	size 4	Day 210	measured by	measurement 5	weight 5	size 5	Day 240	measured by	measurement 6	weight 6	size 6	Day 270	measured by	measurement 7	weight 7	size 7	Day 300	measured by	measurement 8	weight 8	size 8
1	Poecilia formosa Genome line	n/a	2021-05-08		TG4F6	EnN	no	Yes	2021-06-07	2021-08-06	Tyler	2021-08-06	0.5	27	2021-09-05	Ingo	2021-09-05	0.8	32	2021-10-05	Tyler	2021-10-05	0.9	32	2021-11-04	Ingo	2021-11-04	1.1	34	2021-12-04	Tyler	2021-12-04	1.3	37	2022-01-03					2022-02-02					2022-03-04
2	Poecilia formosa Genome line	n/a	2021-05-08		TG4F1	EN	yes	Yes	2021-06-07	2021-08-06	Tyler	2021-08-06	0.1	19	2021-09-05	Ingo	2021-09-05	0.6	29	2021-10-05	Tyler	2021-10-05	0.8	29	2021-11-04	Ingo	2021-11-04	1.1	31	2021-12-04	Tyler	2021-12-04	1.2	35	2022-01-03					2022-02-02					2022-03-04
3	Poecilia formosa Genome line	n/a	2021-05-08		TG4F7	nEN	yes	Yes	2021-06-07	2021-08-06	Tyler	2021-08-06	0.3	23	2021-09-05	Ingo	2021-09-05	0.5	27	2021-10-05	Tyler	2021-10-05	0.7	27	2021-11-04	Ingo	2021-11-04	1.1	33	2021-12-04	Tyler	2021-12-04	1.2	39	2022-01-03					2022-02-02					2022-03-04
4	Poecilia formosa Genome line	n/a	2021-05-08		TG4F3	nEnN	no	Yes	2021-06-07	2021-08-06	Tyler	2021-08-06	0.6	27	2021-09-05	Ingo	2021-09-05	0.7	30	2021-10-05	Tyler	2021-10-05	0.7	30	2021-11-04	Ingo	2021-11-04	1.1	33	2021-12-04	Tyler	2021-12-04	1.2	39	2022-01-03					2022-02-02					2022-03-04
5	Poecilia formosa Genome line	n/a	2021-06-13	2022-03-31	TG4F2	EN	yes		2021-07-13	2021-09-11	Ingo	2021-09-11	0.6	28	2021-10-11	Tyler	2021-10-11	0.7	31	2021-11-10	Tyler	2021-11-10	0.8	32	2021-12-10	Tyler	2021-12-10	0.7	33	2022-01-09	Tyler	2022-01-09	0.7	33	2022-01-03					2022-03-10					2022-04-09
6	Poecilia formosa Genome line	n/a	2021-06-13		TG4F8	nEN	yes	Yes	2021-07-13	2021-09-11	Ingo	2021-09-11	0.6	28	2021-10-11	Tyler	2021-10-11	0.7	30	2021-11-10	Tyler	2021-11-10	1	34	2021-12-10	Tyler	2021-12-10	1.1	36	2022-01-09	Tyler	2022-01-09	1.3	37	2022-01-03					2022-03-10					2022-04-09
7	Poecilia formosa Genome line	GH 68	2021-06-23	29-Mar-22 (found dead)	TG4B3	EnN	no		2021-07-23	2021-09-21	Ingo	2021-09-24	0.6	28	2021-10-21	Ingo	2021-10-21	0.9	29	2021-11-20	Ingo	2021-11-20	1.1	34	2021-12-20	Tyler	2021-12-21	1.1	35	2022-01-19	Tyler	2022-01-19	1.1	35	2022-02-08					2022-03-20					2022-04-19
8	Poecilia formosa Genome line	GH	2021-07-09		TG3B8	nEnN	no	Yes	2021-08-08	2021-10-07	Tyler	2021-10-07	0.6	29	2021-11-06	Ingo	2021-11-06	1.1	29	2021-12-06	Tyler	2021-12-06	1.2	37	2022-01-05	Tyler	2022-01-05	1.3	37	2022-02-04	Tyler	2022-02-06	1.5	37	2022-02-08					2022-04-05					2022-05-05
9	Poecilia formosa Genome line	GH	2021-07-09		TG3F4	EN	yes	Yes	2021-08-08	2021-10-07	Tyler	2021-10-07	0.7	31	2021-11-06	Ingo	2021-11-06	1.1	33	2021-12-06	Tyler	2021-12-06	1	36	2022-01-05	Tyler	2022-01-05	1.1	36	2022-02-04	Tyler	2022-02-06	1.2	36	2022-02-18					2022-04-05					2022-05-05
10	Poecilia formosa Genome line	GH	2021-07-09		TG3F5	nEN	yes	Yes	2021-08-08	2021-10-07	Tyler	2021-10-07	0.7	30	2021-11-06	Ingo	2021-11-06	1.1	34	2021-12-06	Tyler	2021-12-06	1	35	2022-01-05	Tyler	2022-01-05	1.1	35	2022-02-04	Tyler	2022-02-06	1.4	36	2022-03-06					2022-04-05					2022-05-05
11	Poecilia formosa Genome line	LF top left	2021-07-22		TG3B9	EN	yes	Yes	2021-08-21	2021-10-20	Ingo	2021-10-20	0.6	28	2021-11-19	Ingo	2021-11-19	1.7	37	2021-12-19	Tyler	2021-12-19	1.5	39	2022-01-18	Ingo	2022-01-18	1.5	39	2022-02-17	Tyler	2022-02-18	1.7	40	2022-03-06					2022-04-18					2022-05-18
12	Poecilia formosa Genome line	LF top left	2021-07-22		TG3B10	EN	yes	Yes	2021-08-21	2021-10-20	Ingo	2021-10-20	0.5	25	2021-11-19	Ingo	2021-11-19	1.1	31	2021-12-19	Tyler	2021-12-19	1.1	35	2022-01-18	Ingo	2022-01-18	1	34	2022-02-17	Tyler	2022-02-18	1.2	35	2022-03-06					2022-04-18					2022-05-18
13	Poecilia formosa Genome line	LF top left	2021-07-22		TG3F9	nEnN	no	Yes	2021-08-21	2021-10-20	Ingo	2021-10-20	0.4	24	2021-11-19	Ingo	2021-11-19	1.1	29	2021-12-19	Tyler	2021-12-19	1.1	35	2022-01-18	Ingo	2022-01-18	1.2	34	2022-02-17	Tyler	2022-02-18	1.4	37	2022-03-19					2022-04-18					2022-05-18
14	Poecilia formosa Genome line	LF top left	2021-07-22		TG3F12	EnN	no	Yes	2021-08-21	2021-10-20	Ingo	2021-10-20	0.7	28	2021-11-19	Ingo	2021-11-19	1.1	34	2021-12-19	Tyler	2021-12-19	1.3	39	2022-01-18	Ingo	2022-01-18	1.6	39	2022-02-17	Tyler	2022-02-18	1.5	39	2022-03-19					2022-04-18					2022-05-18
15	Poecilia formosa Genome line	LF top right	2021-07-25	22-Dec-21 (accidental chemical pollution)	TG4F4	nEN	yes		2021-08-24	2021-10-23	Tyler & Debbie	2021-10-23	0.3	22	2021-11-22	Tyler	2021-11-22	0.7	30	2021-12-22	Debbie & Tyler	2021-12-22	0.5	33	2022-01-21					2022-02-20					2022-03-19					2022-04-21					2022-05-21
16	Poecilia formosa Genome line	LF top right	2021-07-25		TG3F1	nEN	yes	Yes	2021-08-24	2021-10-23	Tyler & Debbie	2021-10-23	0.4	22	2021-11-22	Tyler	2021-11-22	0.8	31	2021-12-22	Debbie & Tyler	2021-12-22	0.9	32	2022-01-21	Tyler	2022-01-21	0.9	33	2022-02-20	Debbie	2022-02-20	1.1	34	2022-03-19					2022-04-21					2022-05-21
17	Poecilia formosa Genome line	LF top right	2021-07-25		TG3F2	nEN	yes	Yes	2021-08-24	2021-10-23	Tyler & Debbie	2021-10-23	0.4	22	2021-11-22	Tyler	2021-11-22	0.7	29	2021-12-22	Debbie & Tyler	2021-12-22	0.8	34	2022-01-21	Tyler	2022-01-21	0.9	34	2022-02-20	Debbie	2022-02-20	1	35	2022-03-22					2022-04-21					2022-05-21
18	Poecilia formosa Genome line	LF top right	2021-07-25		TG3F3	EnN	no	Yes	2021-08-24	2021-10-23	Tyler & Debbie	2021-10-23	0.7	29	2021-11-22	Tyler	2021-11-22	1.2	36	2021-12-22	Debbie & Tyler	2021-12-22	1.2	36	2022-01-21	Tyler	2022-01-21	1.1	36	2022-02-20	Debbie	2022-02-20	1.6	39	2022-03-22					2022-04-21					2022-05-21
19	Poecilia formosa Genome line	LF top right	2021-07-25		TG3F6	nEnN	no	Yes	2021-08-24	2021-10-23	Tyler & Debbie	2021-10-23	0.3	24	2021-11-22	Tyler	2021-11-22	0.9	33	2021-12-22	Debbie & Tyler	2021-12-22	1.1	35	2022-01-21	Tyler	2022-01-21	1.1	36	2022-02-20	Debbie	2022-02-20	1.4	39	2022-03-22					2022-04-21					2022-05-21
20	Poecilia formosa Genome line	LF top right	2021-07-25		TG3F7	EN	yes	Yes	2021-08-24	2021-10-23	Tyler & Debbie	2021-10-23	0.9	31	2021-11-22	Tyler	2021-11-22	1.2	35	2021-12-22	Debbie & Tyler	2021-12-22	1.5	38	2022-01-21	Tyler	2022-01-21	1.7	40	2022-02-20	Debbie	2022-02-20	1.9	41	2022-03-22					2022-04-21					2022-05-21
21	Poecilia formosa Genome line	LF top right	2021-07-25		TG3F8	EN	yes	Yes	2021-08-24	2021-10-23	Tyler & Debbie	2021-10-23	0.7	29	2021-11-22	Tyler	2021-11-22	1.1	35	2021-12-22	Debbie & Tyler	2021-12-22	1.4	36	2022-01-21	Tyler	2022-01-21	1.3	36	2022-02-20	Debbie	2022-02-20	1.7	39	2022-03-22					2022-04-21					2022-05-21
22	Poecilia formosa Genome line	LF top right	2021-07-25		TG3F10	nEnN	no	Yes	2021-08-24	2021-10-23	Tyler & Debbie	2021-10-23	0.2	21	2021-11-22	Tyler	2021-11-22	0.7	30	2021-12-22	Debbie & Tyler	2021-12-22	1.1	33	2022-01-21	Tyler	2022-01-21	1.1	35	2022-02-20	Debbie	2022-02-20	1.4	38	2022-03-22					2022-04-21					2022-05-21
23	Poecilia formosa Genome line	LF top right	2021-07-25		TG3F11	EnN	no	Yes	2021-08-24	2021-10-23	Tyler & Debbie	2021-10-23	0.7	30	2021-11-22	Tyler	2021-11-22	1.1	35	2021-12-22	Debbie & Tyler	2021-12-22	1.4	38	2022-01-21	Tyler	2022-01-21	1.7	40	2022-02-20	Debbie	2022-02-20	1.9	42	2022-03-22					2022-04-21					2022-05-21
24	Poecilia formosa Genome line	LF top right	2021-07-25		TG3F13	nEnN	no	Yes	2021-08-24	2021-10-23	Tyler & Debbie	2021-10-23	0.2	20	2021-11-22	Tyler	2021-11-22	0.8	31	2021-12-22	Debbie & Tyler	2021-12-22	0.9	33	2022-01-21	Tyler	2022-01-21	1.1	33	2022-02-20	Debbie	2022-02-20	1.2	35	2022-03-22					2022-04-21					2022-05-21
25	Poecilia formosa Genome line	LF top right	2021-07-25		TG3B1	EnN	no	Yes	2021-08-24	2021-10-23	Tyler & Debbie	2021-10-23	0.8	30	2021-11-22	Tyler	2021-11-22	1.6	37	2021-12-22	Debbie & Tyler	2021-12-22	1.8	40	2022-01-21	Tyler	2022-01-21	2.4	42	2022-02-20	Debbie	2022-02-20	2.5	43	2022-03-22					2022-04-21					2022-05-21
26	Poecilia formosa Genome line	LF top right	2021-07-25		TG3B2	EnN	no	Yes	2021-08-24	2021-10-23	Tyler & Debbie	2021-10-23	0.8	30	2021-11-22	Tyler	2021-11-22	1.1	35	2021-12-22	Debbie & Tyler	2021-12-22	1.1	35	2022-01-21	Tyler	2022-01-21	1.2	36	2022-02-20	Debbie	2022-02-20	1.1	41	2022-03-22					2022-04-21					2022-05-21
27	Poecilia formosa Genome line	LF top right	2021-07-25		TG3B3	nEN	yes	Yes	2021-08-24	2021-10-23	Tyler & Debbie	2021-10-23	0.6	26	2021-11-22	Tyler	2021-11-22	1.1	35	2021-12-22	Debbie & Tyler	2021-12-22	1.1	35	2022-01-21	Tyler	2022-01-21	1.2	35	2022-02-20	Debbie	2022-02-20	1.5	40	2022-03-22					2022-04-21					2022-05-21
28	Poecilia formosa Genome line	LF top right	2021-07-25		TG4B1	nEN	yes	Yes	2021-08-24	2021-10-23	Tyler & Debbie	2021-10-23	0.4	23	2021-11-22	Tyler	2021-11-22	0.8	29	2021-12-22	Debbie & Tyler	2021-12-22	0.9	32	2022-01-21	Tyler	2022-01-21	1	34	2022-02-20	Debbie	2022-02-20	1.2	36	2022-03-22					2022-04-21					2022-05-21
29	Poecilia formosa Genome line	LF top right	2021-07-25		TG4B4	EN	yes	Yes	2021-08-24	2021-10-23	Tyler & Debbie	2021-10-23	0.8	30	2021-11-22	Tyler	2021-11-22	1.2	35	2021-12-22	Debbie & Tyler	2021-12-22	1.3	36	2022-01-21	Tyler	2022-01-21	1.2	36	2022-02-20	Debbie	2022-02-20	1.3	38	2022-03-22					2022-04-21					2022-05-21
30	Poecilia formosa Genome line	LF top right	2021-07-25		TG4B6	nEnN	no	Yes	2021-08-24	2021-10-23	Tyler & Debbie	2021-10-23	0.4	24	2021-11-22	Tyler	2021-11-22	0.6	28	2021-12-22	Debbie & Tyler	2021-12-22	0.8	30	2022-01-21	Tyler	2022-01-21	0.9	31	2022-02-20	Debbie	2022-02-20	1	35	2022-03-22					2022-04-21					2022-05-21
31	Poecilia formosa Genome line	LF top right	2021-07-25		TG4B9	nEnN	no	Yes	2021-08-24	2021-10-23	Tyler & Debbie	2021-10-23	0.4	24	2021-11-22	Tyler	2021-11-22	0.7	31	2021-12-22	Debbie & Tyler	2021-12-22	0.9	32	2022-01-21	Tyler	2022-01-21	0.9	32	2022-02-20	Debbie	2022-02-20	1.1	35	2022-03-22					2022-04-21					2022-05-21
32	Poecilia formosa Genome line	LF top right	2021-07-25		TG4B11	EN	yes	Yes	2021-08-24	2021-10-23	Tyler & Debbie	2021-10-23	0.6	30	2021-11-22	Tyler	2021-11-22	1	34	2021-12-22	Debbie & Tyler	2021-12-22	1	34	2022-01-21	Tyler	2022-01-21	1	34	2022-02-20	Debbie	2022-02-20	1.2	37	2022-03-22					2022-04-21					2022-05-21
33	Poecilia formosa Genome line	LF top right	2021-07-25		TG4B12	EnN	no	Yes	2021-08-24	2021-10-23	Tyler & Debbie	2021-10-23	0.6	27	2021-11-22	Tyler	2021-11-22	1.2	35	2021-12-22	Debbie & Tyler	2021-12-22	1.2	36	2022-01-21	Tyler	2022-01-21	1.2	36	2022-02-20	Debbie	2022-02-20	1.5	38	2022-03-22					2022-04-21					2022-05-21
34	Poecilia formosa Genome line	LF top right	2021-07-25	2021-08-30	TG4B13	nEnN	no		2021-08-24	2021-10-23					2021-11-22					2021-12-22					2022-01-21					2022-02-20					2022-03-22					2022-04-21					2022-05-21
35	Poecilia formosa Genome line	LF top right	2021-07-25		TG3B5	EnN	no	Yes	2021-08-24	2021-10-23	Tyler & Debbie	2021-10-23	1	32	2021-11-22	Tyler	2021-11-22	1.7	39	2021-12-22	Debbie & Tyler	2021-12-22	1.6	39	2022-01-21	Tyler	2022-01-21	1.5	39	2022-02-20	Debbie	2022-02-20	1.7	42	2022-03-22					2022-04-21					2022-05-21
36	Poecilia formosa Genome line	LF top right	2021-07-25		TG3B6	EN	yes	Yes	2021-08-24	2021-10-23	Tyler & Debbie	2021-10-23	1	33	2021-11-22	Tyler	2021-11-22	1.6	38	2021-12-22	Debbie & Tyler	2021-12-22	1.3	38	2022-01-21	Tyler	2022-01-21	1.3	38	2022-02-20	Debbie	2022-02-20	1.5	39	2022-03-22					2022-04-21					2022-05-21
37	Poecilia formosa Genome line	LF top right	2021-07-25		TG3B7	nEN	yes	Yes	2021-08-24	2021-10-23	Tyler & Debbie	2021-10-23	0.6	27	2021-11-22	Tyler	2021-11-22	1.2	34	2021-12-22	Debbie & Tyler	2021-12-22	1.2	36	2022-01-21	Tyler	2022-01-21	1.2	36	2022-02-20	Debbie	2022-02-20	1.4	38	2022-03-22					2022-04-21					2022-05-21
38	Poecilia formosa Genome line	LF top right	2021-07-25		TG3B11	nEnN	no	Yes	2021-08-24	2021-10-23	Tyler & Debbie	2021-10-23	0.5	26	2021-11-22	Tyler	2021-11-22	1.2	34	2021-12-22	Debbie & Tyler	2021-12-22	1.2	36	2022-01-21	Tyler	2022-01-21	1.4	36	2022-02-20	Debbie	2022-02-20	1.5	37	2022-03-22					2022-04-21					2022-05-21
39	Poecilia formosa Genome line	LF top right	2021-07-25		TG3B12	nEnN	no	Yes	2021-08-24	2021-10-23	Tyler & Debbie	2021-10-23	0.6	26	2021-11-22	Tyler	2021-11-22	1.3	35	2021-12-22	Debbie & Tyler	2021-12-22	1.2	37	2022-01-21	Tyler	2022-01-21	1.2	37	2022-02-20	Debbie	2022-02-20	1.5	38	2022-03-22					2022-04-21					2022-05-21
40	Poecilia formosa Genome line	LF top right	2021-07-25		TG3B13	EnN	yes	Yes	2021-08-24	2021-10-23	Tyler & Debbie	2021-10-23	0.5	27	2021-11-22	Tyler	2021-11-22	1.1	35	2021-12-22	Debbie & Tyler	2021-12-22	1.2	37	2022-01-21	Tyler	2022-01-21	1.6	39	2022-02-20	Debbie	2022-02-20	1.7	40	2022-03-22					2022-04-21					2022-05-21
41	Poecilia formosa Genome line	LF top right	2021-07-25	2021-11-17	TG3B4	nEN	yes		2021-08-24	2021-10-23	Tyler & Debbie	2021-10-23	0.5	27	2021-11-22					2021-12-22					2022-01-21					2022-02-20					2022-03-22					2022-04-21					2022-05-21
42	Poecilia formosa Genome line	LF top right	2021-07-26	02-Jan-22 (Euthanized due to infection)	TG2B13	nEN	yes		2021-08-25	2021-10-24	Debbie	2021-10-24	0.3	22	2021-11-23	Debbie	2021-11-23	0.5	27	2021-12-23	Debbie	2021-12-23	0.8	32	2022-01-22					2022-02-21					2022-03-22					2022-04-22					2022-05-22
43	Poecilia formosa Genome line	LF top right	2021-07-26		TG2B8	EN	yes	Yes	2021-08-25	2021-10-24	Debbie	2021-10-24	0.4	23	2021-11-23	Debbie	2021-11-23	0.9	33	2021-12-23	Debbie	2021-12-23	1	35	2022-01-22	Debbie	2022-01-22	1.3	36	2022-02-21	Debbie	2022-02-21	1.5	40	2022-03-22					2022-04-22					2022-05-22
44	Poecilia formosa Genome line	LF top right	2021-07-26		TG2B3	EnN	no	Yes	2021-08-25	2021-10-24	Debbie	2021-10-24	0.5	23	2021-11-23	Debbie	2021-11-23	1.1	31	2021-12-23	Debbie	2021-12-23	1.3	37	2022-01-22	Debbie	2022-01-22	1.5	38	2022-02-21	Debbie	2022-02-21	1.6	41	2022-03-23					2022-04-22					2022-05-22
45	Poecilia formosa Genome line	LF top right	2021-07-26		TG4B5	nEN	yes	Yes	2021-08-25	2021-10-24	Debbie	2021-10-24	0.3	23	2021-11-23	Debbie	2021-11-23	0.7	30	2021-12-23	Debbie	2021-12-23	0.8	31	2022-01-22	Debbie	2022-01-22	0.9	36	2022-02-21	Debbie	2022-02-21	1.2	36	2022-03-23					2022-04-22					2022-05-22
46	Poecilia formosa Genome line	LF top right	2021-07-26		TG2F11	nEnN	no	Yes	2021-08-25	2021-10-24	Debbie	2021-10-24	0.4	24	2021-11-23	Debbie	2021-11-23	0.8	31	2021-12-23	Debbie	2021-12-23	1.1	34	2022-01-22	Debbie	2022-01-22	1.2	36	2022-02-21	Debbie	2022-02-21	1.2	37	2022-03-23					2022-04-22					2022-05-22
47	Poecilia formosa Genome line	LF top right	2021-07-26		TG2F13	EN	yes	Yes	2021-08-25	2021-10-24	Debbie	2021-10-24	0.4	25	2021-11-23	Debbie	2021-11-23	0.8	29	2021-12-23	Debbie	2021-12-23	1	35	2022-01-22	Debbie	2022-01-22	1.1	35	2022-02-21	Debbie	2022-02-21	1.4	38	2022-03-23					2022-04-22					2022-05-22
48	Poecilia formosa Genome line	LF top right	2021-07-26	2021-12-19	TG2F8	nEnN	no		2021-08-25	2021-10-24	Debbie	2021-10-24	0.2	20	2021-11-23	Debbie	2021-11-23	0.6	28	2021-12-23					2022-01-22					2022-02-21					2022-03-23					2022-04-22					2022-05-22
49	Poecilia formosa Genome line	LF top right	2021-07-26		TG2F5	EnN	no	Yes	2021-08-25	2021-10-24	Debbie	2021-10-24	0.2	20	2021-11-23	Debbie	2021-11-23	0.8	31	2021-12-23	Debbie	2021-12-23	1	35	2022-01-22	Debbie	2022-01-22	1.1	37	2022-02-21	Debbie	2022-02-21	1.3	40	2022-03-23					2022-04-22					2022-05-22
50	Poecilia formosa Genome line	LF top right	2021-07-26	2021-12-24	TG2F3	nEN	yes		2021-08-25	2021-10-24	Debbie	2021-10-24	0.3	23	2021-11-23	Debbie	2021-11-23	0.9	30	2021-12-23	Debbie	2021-12-23	1	31	2022-01-22					2022-02-21					2022-03-23					2022-04-22					2022-05-22
51	Poecilia formosa Genome line	LF top right	2021-07-26		TG4B2	nEN	yes	Yes	2021-08-25	2021-10-24	Debbie	2021-10-24	0.3	22	2021-11-23	Debbie	2021-11-23	0.6	28	2021-12-23	Debbie	2021-12-23	0.8	32	2022-01-22	Debbie	2022-01-22	0.9	34	2022-02-21	Debbie	2022-02-21	1	36	2022-03-23					2022-04-22					2022-05-22
52	Poecilia formosa Genome line	GH 68	2021-08-03		TG4F5	EN	yes	Yes	2021-09-02	2021-11-01	Tyler	2021-11-01	0.6	29	2021-12-01	Tyler	2021-12-01	1	33	2021-12-31	Debbie & Tyler	2021-12-31	0.9	33	2022-01-30	Debbie & Tyler	2022-01-30	0.9	34	2022-03-01	Tyler & Chance	2022-03-01	1.1	35	2022-03-23					2022-04-30					2022-05-30
53	Poecilia formosa Genome line	GH 68	2021-08-03		TG4F9	EnN	yes	Yes	2021-09-02	2021-11-01	Tyler	2021-11-01	0.6	28	2021-12-01	Tyler	2021-12-01	0.9	32	2021-12-31	Debbie & Tyler	2021-12-31	0.9	33	2022-01-30	Debbie & Tyler	2022-01-30	0.8	33	2022-03-01	Tyler & Chance	2022-03-01	0.9	33	2022-03-23					2022-04-30					2022-05-30
54	Poecilia formosa Genome line	GH 68	2021-08-03		TG4F12	nEN	yes	Yes	2021-09-02	2021-11-01	Tyler	2021-11-01	0.3	23	2021-12-01	Tyler	2021-12-01	0.6	28	2021-12-31	Debbie & Tyler	2021-12-31	0.6	30	2022-01-30	Debbie & Tyler	2022-01-30	0.8	30	2022-03-01	Tyler & Chance	2022-03-01	0.9	31	2022-03-31					2022-04-30					2022-05-30
55	Poecilia formosa Genome line	GH 68	2021-08-03		TG2F12	nEN	yes	Yes	2021-09-02	2021-11-01	Tyler	2021-11-01	0.5	27	2021-12-01	Tyler	2021-12-01	0.9	34	2021-12-31	Debbie & Tyler	2021-12-31	1.3	36	2022-01-30	Debbie & Tyler	2022-01-30	1.4	37	2022-03-01	Tyler & Chance	2022-03-01	1.5	38	2022-03-31					2022-04-30					2022-05-30
56	Poecilia formosa Genome line	GH 68	2021-08-03		TG2F10	EN	yes	Yes	2021-09-02	2021-11-01	Tyler	2021-11-01	0.7	29	2021-12-01	Tyler	2021-12-01	1	35	2021-12-31	Debbie & Tyler	2021-12-31	1	35	2022-01-30	Debbie & Tyler	2022-01-30	1.1	35	2022-03-01	Tyler & Chance	2022-03-01	1.3	37	2022-03-31					2022-04-30					2022-05-30
57	Poecilia formosa Genome line	GH 68	2021-08-03		TG4B7	EN	yes	Yes	2021-09-02	2021-11-01	Tyler	2021-11-01	0.9	32	2021-12-01	Tyler	2021-12-01	1.1	35	2021-12-31	Debbie & Tyler	2021-12-31	1.1	35	2022-01-30	Debbie & Tyler	2022-01-30	1.1	35	2022-03-01	Tyler & Chance	2022-03-01	1.3	36	2022-03-31					2022-04-30					2022-05-30
58	Poecilia formosa Genome line	GH 68	2021-08-03		TG2B1	nEN	yes	Yes	2021-09-02	2021-11-01	Tyler	2021-11-01	0.7	28	2021-12-01	Tyler	2021-12-01	1.2	35	2021-12-31	Debbie & Tyler	2021-12-31	1.5	38	2022-01-30	Debbie & Tyler	2022-01-30	1.6	38	2022-03-01	Tyler & Chance	2022-03-01	1.8	40	2022-03-31					2022-04-30					2022-05-30
59	Poecilia formosa Genome line	GH 68	2021-08-03		TG2B2	nEN	yes	Yes	2021-09-02	2021-11-01	Tyler	2021-11-01	0.5	24	2021-12-01	Tyler	2021-12-01	0.7	30	2021-12-31	Debbie & Tyler	2021-12-31	0.7	32	2022-01-30	Debbie & Tyler	2022-01-30	0.9	32	2022-03-01	Tyler & Chance	2022-03-01	1.2	35	2022-03-31					2022-04-30					2022-05-30
60	Poecilia formosa Genome line	GH 68	2021-08-03	17-Nov-21(Euthanized for possible ich infection)	TG2B10	nEnN	no		2021-09-02	2021-11-01	Tyler	2021-11-01	0.4	25	2021-12-01					2021-12-31					2022-01-30					2022-03-01					2022-03-31					2022-04-30					2022-05-30
61	Poecilia formosa Genome line	GH 68	2021-08-03	19-Nov-21 (Removed from experiment for possible ich infection)	TG2B6	nEnN	no		2021-09-02	2021-11-01	Tyler	2021-11-01	0.4	25	2021-12-01					2021-12-31					2022-01-30					2022-03-01					2022-03-31					2022-04-30					2022-05-30
62	Poecilia formosa Genome line	GH 68	2021-08-03		TG2F1	EnN	no	Yes	2021-09-02	2021-11-01	Tyler	2021-11-01	0.5	27	2021-12-01	Tyler	2021-12-01	0.6	28	2021-12-31	Debbie & Tyler	2021-12-31	0.6	30	2022-01-30	Debbie & Tyler	2022-01-30	0.8	31	2022-03-01	Tyler & Chance	2022-03-01	1	34	2022-03-31					2022-04-30					2022-05-30
63	Poecilia formosa Genome line	GH 68	2021-08-03		TG1F2	EnN	no	Yes	2021-09-02	2021-11-01	Tyler	2021-11-01	0.3	23	2021-12-01	Tyler	2021-12-01	0.5	25	2021-12-31	Debbie & Tyler	2021-12-31	0.7	30	2022-01-30	Debbie & Tyler	2022-01-30	0.8	30	2022-03-01	Tyler & Chance	2022-03-01	1	33	2022-03-31					2022-04-30					2022-05-30
64	Poecilia formosa Genome line	GH 68	2021-08-03		TG2F7	nEnN	no	Yes	2021-09-02	2021-11-01	Tyler	2021-11-01	0.4	23	2021-12-01	Tyler	2021-12-01	0.9	32	2021-12-31	Debbie & Tyler	2021-12-31	1.3	36	2022-01-30	Debbie & Tyler	2022-01-30	1.7	39	2022-03-01	Tyler & Chance	2022-03-01	2	41	2022-03-31					2022-04-30					2022-05-30
65	Poecilia formosa Genome line	GH 68	2021-08-03		TG2F4	nEnN	no	Yes	2021-09-02	2021-11-01	Tyler	2021-11-01	0.6	26	2021-12-01	Tyler	2021-12-01	1	34	2021-12-31	Debbie & Tyler	2021-12-31	1.1	33	2022-01-30	Debbie & Tyler	2022-01-30	1	35	2022-03-01	Tyler & Chance	2022-03-01	1.3	36	2022-03-31					2022-04-30					2022-05-30
66	Poecilia formosa Genome line	GH 68	2021-07-25		TG4B8	EN	yes	Yes	2021-08-24	2021-10-23	Debbie	2021-10-24	1	32	2021-11-22	Debbie	2021-11-23	1.3	37	2021-12-22	Debbie	2021-12-23	1.5	38	2022-01-21	Debbie	2022-01-22	1.4	40	2022-02-20	Debbie	2022-02-21	1.5	40	2022-03-31					2022-04-21					2022-05-21
67	Poecilia formosa Genome line	GH 68	2021-08-03		TG2F6	EnN	no	Yes	2021-09-02	2021-11-01	Tyler	2021-11-01	0.4	23	2021-12-01	Tyler	2021-12-01	1	33	2021-12-31	Debbie & Tyler	2021-12-31	1.3	37	2022-01-30	Debbie & Tyler	2022-01-30	1.5	38	2022-03-01	Tyler & Chance	2022-03-01	1.6	41	2022-03-31					2022-04-30					2022-05-30
68	Poecilia formosa Genome line	GH 68	2021-08-03		TG2F2	EN	yes	Yes	2021-09-02	2021-11-01	Tyler	2021-11-01	0.4	25	2021-12-01	Tyler	2021-12-01	0.5	27	2021-12-31	Debbie & Tyler	2021-12-31	0.6	30	2022-01-30	Debbie & Tyler	2022-01-30	0.6	30	2022-03-01	Tyler & Chance	2022-03-01	0.9	32	2022-03-22					2022-04-30					2022-05-30
69	Poecilia formosa Genome line	GH 68	2021-08-03	2021-09-20	TG1F1	nEnN	no		2021-09-02	2021-11-01					2021-12-01					2021-12-31					2022-01-30					2022-03-01					2022-03-31					2022-04-30					2022-05-30
70	Poecilia formosa Genome line	GH 68	2021-08-03		TG4F10	EnN	no	Yes	2021-09-02	2021-11-01	Tyler	2021-11-01	0.8	29	2021-12-01	Tyler	2021-12-01	1.2	35	2021-12-31	Debbie & Tyler	2021-12-31	1.1	35	2022-01-30	Debbie & Tyler	2022-01-30	1.2	35	2022-03-01	Tyler & Chance	2022-03-01	1.4	38	2022-03-31					2022-04-30					2022-05-30
71	Poecilia formosa Genome line	GH 68	2021-08-03		TG4F13	EN	yes	Yes	2021-09-02	2021-11-01	Tyler	2021-11-01	0.5	27	2021-12-01	Tyler	2021-12-01	0.9	34	2021-12-31	Debbie & Tyler	2021-12-31	1	34	2022-01-30	Debbie & Tyler	2022-01-30	1	34	2022-03-01	Tyler & Chance	2022-03-01	1	36	2022-03-31					2022-04-30					2022-05-30
72	Poecilia formosa Genome line	GH 68	2021-08-03		TG2B4	EnN	no	Yes	2021-09-02	2021-11-01	Tyler	2021-11-01	0.4	24	2021-12-01	Tyler	2021-12-01	0.5	28	2021-12-31	Debbie & Tyler	2021-12-31	0.5	28	2022-01-30	Debbie & Tyler	2022-01-30	0.6	28	2022-03-01	Tyler & Chance	2022-03-01	0.7	29	2022-03-31					2022-04-30					2022-05-30
73	Poecilia formosa Genome line	GH 68	2021-08-03		TG2B7	EnN	no	Yes	2021-09-02	2021-11-01	Tyler	2021-11-01	0.6	29	2021-12-01	Tyler	2021-12-01	1	35	2021-12-31	Debbie & Tyler	2021-12-31	1	35	2022-01-30	Debbie & Tyler	2022-01-30	1.1	37	2022-03-01	Tyler & Chance	2022-03-01	1.4	37	2022-03-31					2022-04-30					2022-05-30
74	Poecilia formosa Genome line	GH 68	2021-08-03		TG2B12	EN	yes	Yes	2021-09-02	2021-11-01	Tyler	2021-11-01	0.6	28	2021-12-01	Tyler	2021-12-01	0.8	32	2021-12-31	Debbie & Tyler	2021-12-31	0.8	32	2022-01-30	Debbie & Tyler	2022-01-30	0.9	33	2022-03-01	Tyler & Chance	2022-03-01	1.2	36	2022-03-31					2022-04-30					2022-05-30
75	Poecilia formosa Genome line	GH 68	2021-08-03		TG2B5	nEnN	no	Yes	2021-09-02	2021-11-01	Tyler	2021-11-01	0.4	22	2021-12-01	Tyler	2021-12-01	0.5	27	2021-12-31	Debbie & Tyler	2021-12-31	0.8	32	2022-01-30	Debbie & Tyler	2022-01-30	0.9	34	2022-03-01	Tyler & Chance	2022-03-01	1.4	37	2022-03-31					2022-04-30					2022-05-30
76	Poecilia formosa Genome line	GH 68	2021-08-03	22-Nov-21 (Euthanized due to infection)	TG2B9	nEN	yes		2021-09-02	2021-11-01	Tyler	2021-11-01	0.5	25	2021-12-01					2021-12-31					2022-01-30					2022-03-01					2022-03-31					2022-04-30					2022-05-30
77	Poecilia formosa Genome line	GH 68	2021-08-03		TG2B11	EnN	no	Yes	2021-09-02	2021-11-01	Tyler	2021-11-01	0.6	28	2021-12-01	Tyler	2021-12-01	1.1	33	2021-12-31	Debbie & Tyler	2021-12-31	1.1	34	2022-01-30	Debbie & Tyler	2022-01-30	1	34	2022-03-01	Tyler & Chance	2022-03-01	1.2	36	2022-03-31					2022-04-30					2022-05-30
78	Poecilia formosa Genome line	GH 68	2021-08-03	2021-11-18	TG2F9	EN	yes		2021-09-02	2021-11-01	Tyler	2021-11-01	0.4	25	2021-12-01					2021-12-31					2022-01-30					2022-03-01					2022-03-31					2022-04-30					2022-05-30
79	Poecilia formosa Genome line	GH 68	2021-08-03		TG4F11	nEnN	no	Yes	2021-09-02	2021-11-01	Tyler	2021-11-01	0.2	22	2021-12-01	Tyler	2021-12-01	0.6	28	2021-12-31	Debbie & Tyler	2021-12-31	0.6	28	2022-01-30	Debbie & Tyler	2022-01-30	0.7	30	2022-03-01	Tyler & Chance	2022-03-01	1.1	38	2022-03-31					2022-04-30					2022-05-30
80	Poecilia formosa Genome line	GH 68	2021-08-03		TG4B10	nEN	yes	Yes	2021-09-02	2021-11-01	Tyler	2021-11-01	0.6	28	2021-12-01	Tyler	2021-12-01	0.7	31	2021-12-31	Debbie & Tyler	2021-12-31	0.8	32	2022-01-30	Debbie & Tyler	2022-01-30	0.8	33	2022-03-01	Tyler & Chance	2022-03-01	1.1	35	2022-03-31					2022-04-30					2022-05-30
[truncated: 52 more columns]
